# Supplementary material for: Impact of Biochar and Bioorganic Fertilizer on Rhizosphere Bacteria in Saline–Alkali Soil
Source: MDPI journal article supplement (doi:10.3390/microorganisms10122310), 2022-11-22
Supplement: s1 [file s1]

## Supplementary Material

**Table S1.** The relative ratio of fresh weight of aerial part

|       | <i>M. crystallinum</i> (%) |                            |                             | <i>A. cordifolia</i> (%)   |                            |                             |
|-------|----------------------------|----------------------------|-----------------------------|----------------------------|----------------------------|-----------------------------|
|       | Coefficient compared to CK | Coefficient compared to FB | Coefficient compared to BOF | Coefficient compared to CK | Coefficient compared to FB | Coefficient compared to BOF |
| CK    | 100                        |                            |                             | 100                        |                            |                             |
| CB    | 127.70                     |                            |                             | 125.45                     |                            |                             |
| MB    | 132.43                     |                            |                             | 121.82                     |                            |                             |
| FB    | 164.86                     | 100                        |                             | 179.09                     | 100                        |                             |
| BOF   | 206.76                     | 125.42                     | 100                         | 192.73                     | 107.62                     | 100                         |
| B-BOF | 238.51                     | 144.67                     | 115.35                      | 203.64                     | 113.71                     | 105.67                      |

**Figure S1.** The pictures of *M. crystallinum* and *A. cordifolia*.

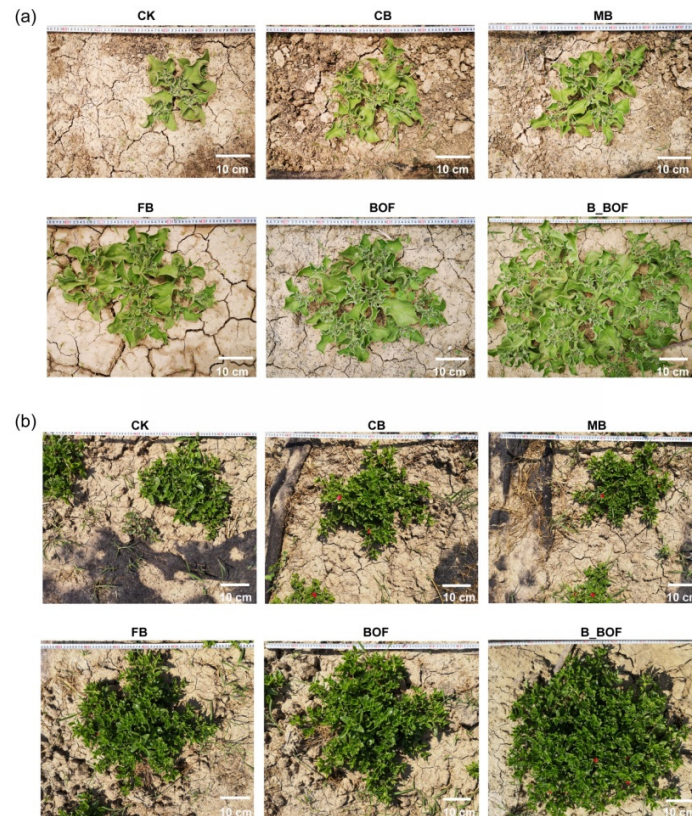

(a) *M. crystallinum*, (b) *A. cordifolia*.

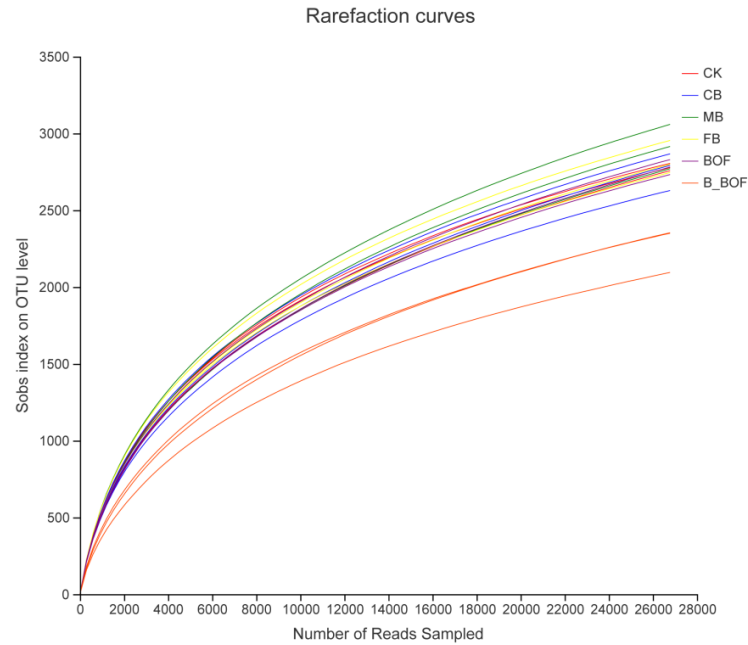

**Figure S2. Rarefaction curves depicting the number of OTUs with 97% similarity identified from different samples**

**Table S2. Operational taxonomic unit richness and diversity indices of different samples**

|       | sobs     | shannon    | simpson        | ace         | chao      | coverage      |
|-------|----------|------------|----------------|-------------|-----------|---------------|
| CK    | 2780±9a  | 6.7±0.01a  | 0.0037±0.0001b | 3868±141bc  | 3884±86ab | 0.964±0.001ab |
| CB    | 2762±72a | 6.65±0.07a | 0.0041±0.0004b | 4177±226abc | 3978±171a | 0.962±0.0014b |
| MB    | 2915±92a | 6.72±0.09a | 0.0037±0.0007b | 4881±209a   | 4244±129a | 0.959±0.0011b |
| FB    | 2833±54a | 6.74±0.03a | 0.0035±0.0002b | 3987±52abc  | 4037±20a  | 0.962±0.0004b |
| BOF   | 2781±21a | 6.61±0.07a | 0.0049±0.0014b | 4264±200ab  | 4071±83a  | 0.962±0.0008b |
| B-BOF | 2266±65b | 5.78±0.08b | 0.0176±0.0021a | 3287±110c   | 3369±95b  | 0.968±0.0011a |

**Table S3. top 38 genera attribution**

|                |                         |
|----------------|-------------------------|
| Acidobacteria  | norank_c_Subgroup_6     |
|                | RB41                    |
|                | Bryobacter              |
| Actinobacteria | Micromonospora          |
|                | Arthrobacter            |
|                | Blastococcus            |
|                | norank_c_Actinobacteria |
|                | norank_f_67-14          |
|                | norank_o_Gaiellales     |

|                  |                                                    |
|------------------|----------------------------------------------------|
|                  | Nocardioides                                       |
|                  | Streptomyces                                       |
|                  | norank_o_Microtrichales                            |
|                  | Marmoricola                                        |
|                  | Actinomadura                                       |
|                  | Nonomuraea                                         |
|                  | Promicromonospora                                  |
| Bacteroidetes    | norank_f_Microscillaceae                           |
| Chloroflexi      | norank_f_JG30-KF-CM45                              |
|                  | norank_c_KD4-96                                    |
|                  | norank_f_A4b                                       |
|                  | norank_o_SBR1031                                   |
|                  | norank_c_TK10                                      |
|                  | norank_f_Roseiflexaceae                            |
|                  | norank_f_Caldilineaceae                            |
|                  | norank_f_Anaerolineaceae                           |
|                  | OLB13                                              |
| Firmicutes       | Bacillus                                           |
|                  | Paenisporosarcina                                  |
| Gemmatimonadetes | norank_f_Gemmatimonadaceae                         |
| Patescibacteria  | norank_f_Saccharimonadaceae                        |
| Proteobacteria   | norank_f_Geminicoccaceae                           |
|                  | Skermanella                                        |
|                  | unclassified_f_Burkholderiaceae                    |
|                  | MND1                                               |
|                  | Pseudomonas                                        |
|                  | Allorhizobium-Neorhizobium-Pararhizobium-Rhizobium |
|                  | Hydrogenophaga                                     |
| Rokubacteria     | norank_o_Rokubacteriales                           |

**Table S4. Correlation network analysis of microbial communities**

|                     | CK-B_BOF | CK-BOF | CK-FB |
|---------------------|----------|--------|-------|
| Node numbers        | 26       | 24     | 27    |
| Edge numbers        | 104      | 45     | 42    |
| Node average degree | 8        | 3.75   | 3.11  |
| Positive edges      | 67       | 26     | 23    |
| Negative edges      | 37       | 19     | 19    |

*The correlation network indices were calculated based on the top 30 genera. The average number of connections per node in the network, that is, the node connectivity.*

**Table S5. Node and degree in correlation network analysis**

| CK-BOF         |        | CK-B_BOF          |        | CK-FB                |        |
|----------------|--------|-------------------|--------|----------------------|--------|
| Node_Name      | Degree | Node_Name         | Degree | Node_Name            | Degree |
| Micromonospora | 10     | norank_f_JG30-KF- | 14     | norank_f_Gemmatimona | 7      |

Supplementary Material

|                              |   |                                  |    |                           |   |
|------------------------------|---|----------------------------------|----|---------------------------|---|
|                              |   | CM45                             |    | daceae                    |   |
| norank_c__Actinobacteria     | 7 | norank_o__Gaiellales             | 13 | norank_f__67-14           | 7 |
| Blastococcus                 | 7 | norank_f__Geminicoccaceae        | 13 | norank_f__Geminicoccaceae | 6 |
| norank_f__Gemmatimona daceae | 7 | norank_f__Gemmatimonadaceae      | 13 | norank_o__Gaiellales      | 5 |
| norank_o__Rokubacteriales    | 6 | norank_c__Actinobacteria         | 12 | Candidatus_Entotheonella  | 5 |
| norank_c__Gemmatimona detes  | 5 | Bryobacter                       | 11 | norank_o__Rokubacteriales | 5 |
| Microvirga                   | 5 | norank_o__Rokubacteriales        | 11 | Bacillus                  | 5 |
| norank_f__Geminicoccaceae    | 5 | norank_c__TK10                   | 11 | norank_f__Roseiflexaceae  | 5 |
| RB41                         | 4 | Micromonospora                   | 10 | Gaiella                   | 5 |
| norank_f__Gemmataceae        | 4 | norank_f__67-14                  | 10 | norank_o__Microtrichales  | 4 |
| norank_c__TK10               | 4 | norank_o__Microtrichales         | 9  | Microvirga                | 4 |
| norank_f__Anaerolineaceae    | 4 | RB41                             | 9  | Arthrobacter              | 3 |
| Nocardioides                 | 3 | norank_c__KD4-96                 | 8  | norank_c__Subgroup_6      | 2 |
| norank_f__Caldilineaceae     | 3 | Paenisporosarcina                | 7  | norank_f__Caldilineaceae  | 2 |
| norank_f__Roseiflexaceae     | 3 | Bacillus                         | 7  | Blastococcus              | 2 |
| norank_c__KD4-96             | 2 | Skermanella                      | 7  | RB41                      | 2 |
| Bryobacter                   | 2 | norank_c__Subgroup_6             | 6  | norank_f__AKYG1722        | 2 |
| norank_o__SBR1031            | 2 | norank_f__Microscillaceae        | 6  | Skermanella               | 2 |
| norank_f__67-14              | 2 | norank_f__Roseiflexaceae         | 6  | norank_f__JG30-KF-CM45    | 2 |
| norank_c__Subgroup_6         | 1 | Pseudomonas                      | 5  | Solirubrobacter           | 2 |
| Skermanella                  | 1 | Nocardioides                     | 4  | norank_f__Gemmataceae     | 1 |
| Marmoricola                  | 1 | Nonomuraea                       | 4  | norank_o__SBR1031         | 1 |
| norank_f__A4b                | 1 | Marmoricola                      | 4  | Streptomyces              | 1 |
| norank_o__Gaiellales         | 1 | unclassified_f__Burkholderiaceae | 4  | norank_c__KD4-96          | 1 |
|                              |   | Streptomyces                     | 3  | norank_c__Actinobacteria  | 1 |
|                              |   | norank_o__SBR1031                | 1  | Marmoricola               | 1 |
|                              |   |                                  |    | norank_c__TK10            | 1 |
